# Supplementary material for: Mechanical stimulation of human hair follicle outer root sheath cultures activates adjacent sensory neurons
Source: PubMed Central journal article supplement (PMC10610912; doi:10.1126/sciadv.adh3273), 2023-10-27
Supplement: sciadv.adh3273_sm.pdf [file sciadv.adh3273_sm.pdf]

Supplementary Materials for  
**Mechanical stimulation of human hair follicle outer root sheath cultures  
activates adjacent sensory neurons**

Julià Agramunt *et al.*

Corresponding author: Claire A Higgins, [c.higgins@imperial.ac.uk](mailto:c.higgins@imperial.ac.uk)

*Sci. Adv.* **9**, eadh3273 (2023)  
DOI: 10.1126/sciadv.adh3273

**The PDF file includes:**

Figs. S1 to S12  
Tables S1 and S2  
Legends for data S1 and S2  
Legend for movie S1

**Other Supplementary Material for this manuscript includes the following:**

Data S1 and S2  
Movie S1

## Figures

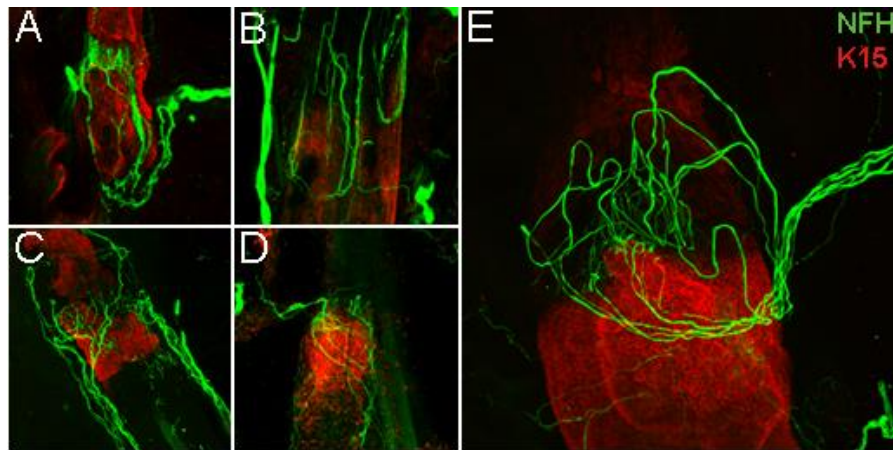

**Figure S1. Volumetric imaging of human hair follicles from 7 individuals.** (A) Longitudinal and circumferential LTMRs around the K15 positive hair follicle cells. (B-D) Longitudinal endings stained above the K15 positive hair follicle cells. (E) Longitudinal and circumferential endings above the K15 positive cells. All panels stained with antibodies against NFH (green) and K15 (red). Scale bars A-D: 500µm, Scale bar E: 200µm

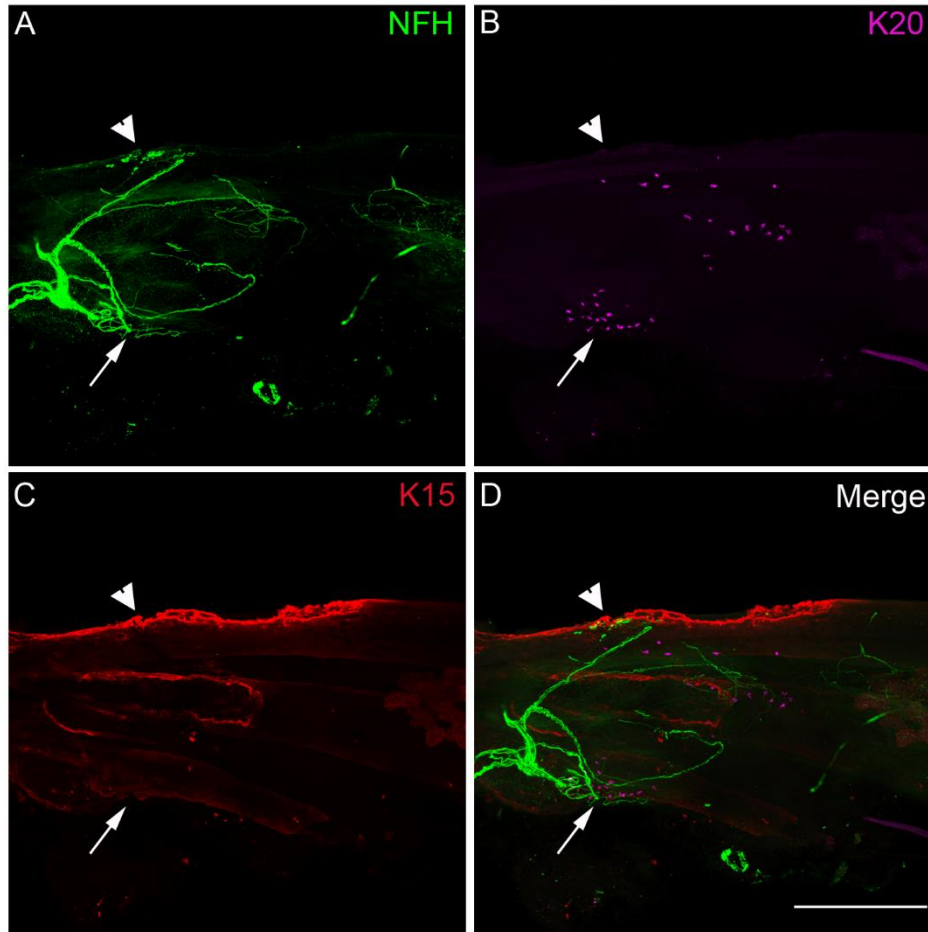

**Figure S2. Confocal imaging of a follicular unit.** (A) NFH positive neuronal nerve endings around hair follicles in a follicular unit. (B) K20 positive merkel cells located within the outer root sheath of hair follicles. (C) K15 marks 3 separate hair follicles in this follicular unit. (D) Merged image showing regions of the follicle with innervation, but no merkel cells (arrowhead) within one follicle, then a densely innervated area with merkel cells (arrow) within another follicle. Scale bar: 200 $\mu$ m

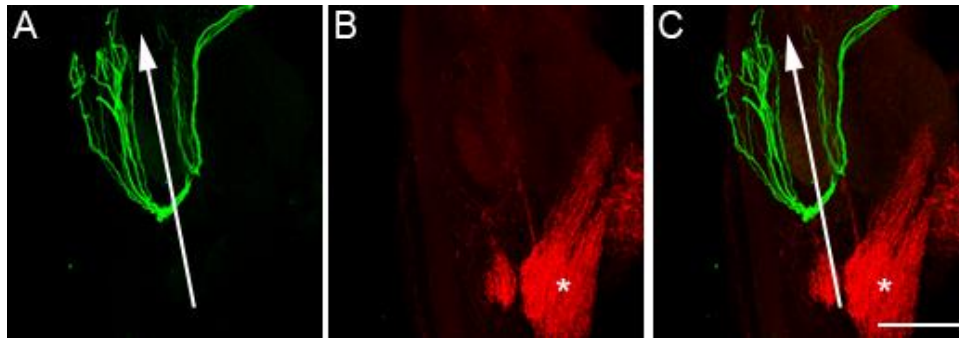

**Figure S3. TH and NFH imaging in a human hair follicle.** (A) NFH staining around the follicle (arrow running along length of follicle and pointing to skin surface). (B) TH staining of the sympathetic nerve in the APM (asterix). (C) Overlaid image showing LTMR localisation above the entry point of the APM. Scale bar. 100µm

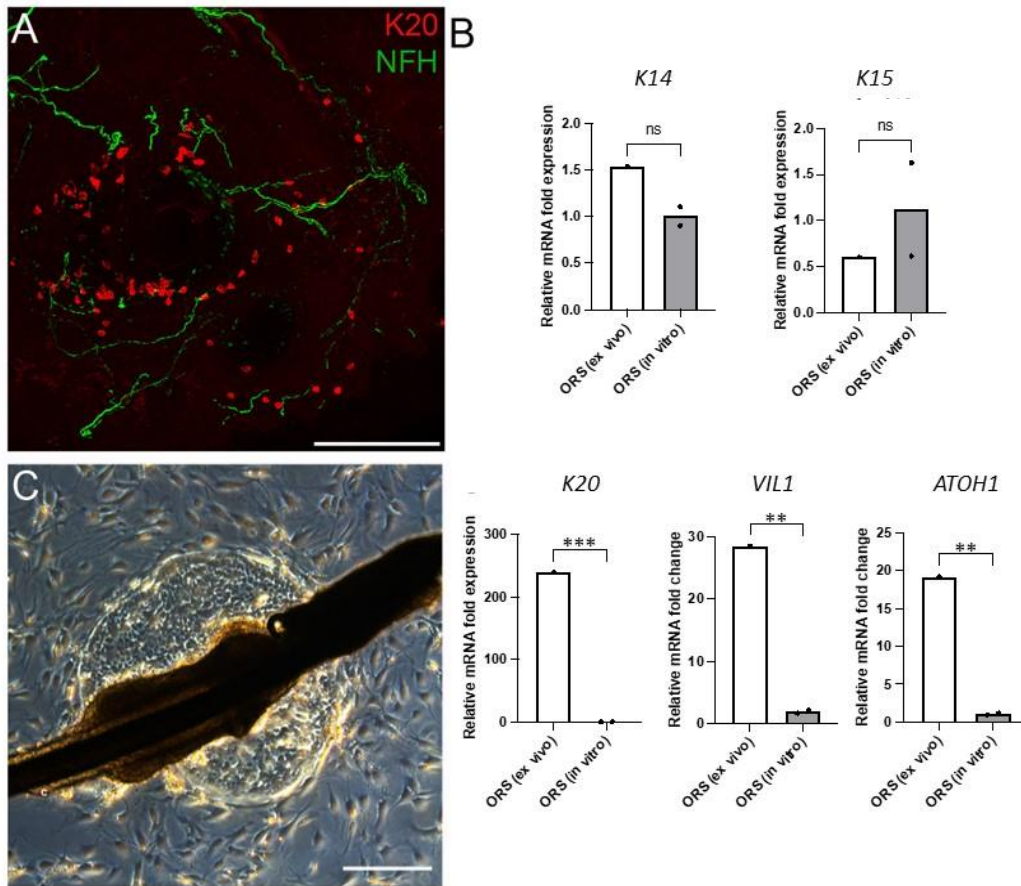

**Figure S4. Merkel cells in the human hair follicle.** (A) K20+ Merkel cells are located within the ORS of human hair follicles. (B) Gene expression of Merkel cell markers (*K20*, *VIL1* and *ATOH1*) is seen in plucked hair fibres (ORS ex vivo), while this expression is lost during culture (ORS in vitro). (C) Example image of an explant culture of ORS cells. Scale bars. 100µm

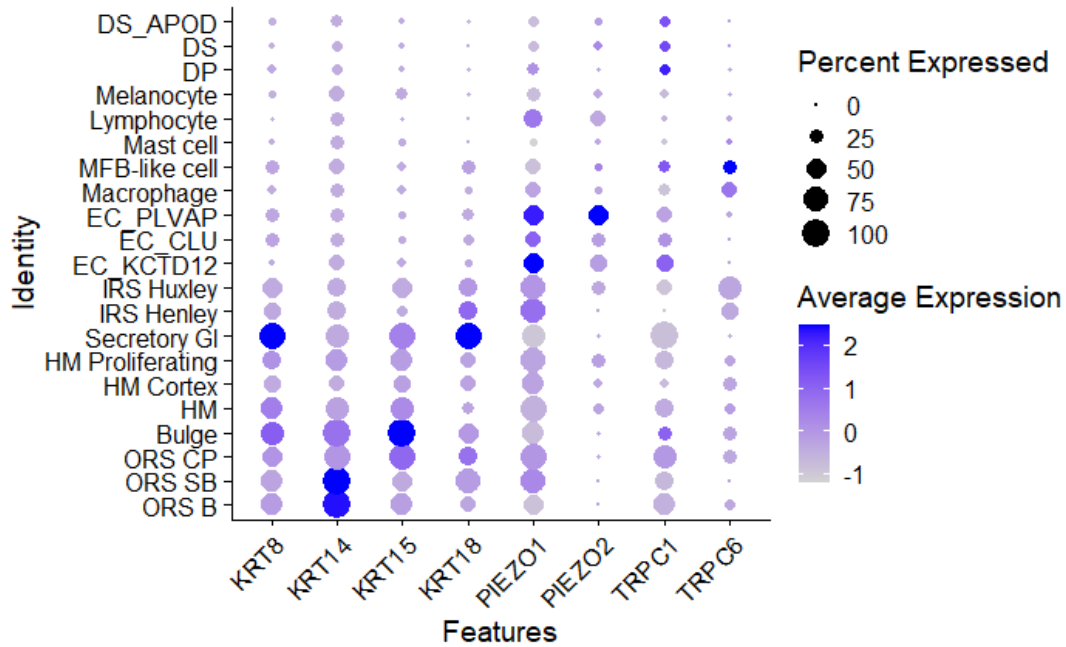

**Figure S5 – scRNAseq data in human hair follicles.** RNA expression of *KRT8*, *KRT14*, *KRT15*, *KRT18*, *PIEZO1*, *PIEZO2*, *TRPC1*, and *TRPC6* (Features) in anagen human hair follicles GSE193269 across cell clusters representative of various hair follicle compartments (Identity). Size of dots represents the total percentage of cells within that cell identity differentially expressing genes of interest. Colour of dots instead represent the average expression level within that cluster.

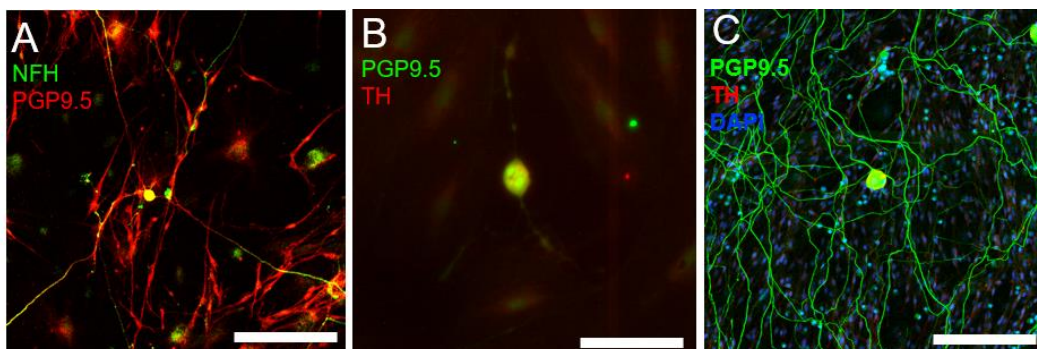

**Figure S6. Characterization of neurons in DRG and ORS-DRG cultures.** (A) Immunostaining of DRG cultures show LTMRs expressing NFH and PGP9.5. (B) TH+ C-LTMRs were also observed in the co-culture system with ORS cells. (C) Neurons PGP9.5 and Th+ show highly developed axonal network with ORS cells (DAPI). Scale bars: A = 100 $\mu$ m, B = 15 $\mu$ m, C = 50 $\mu$ m.

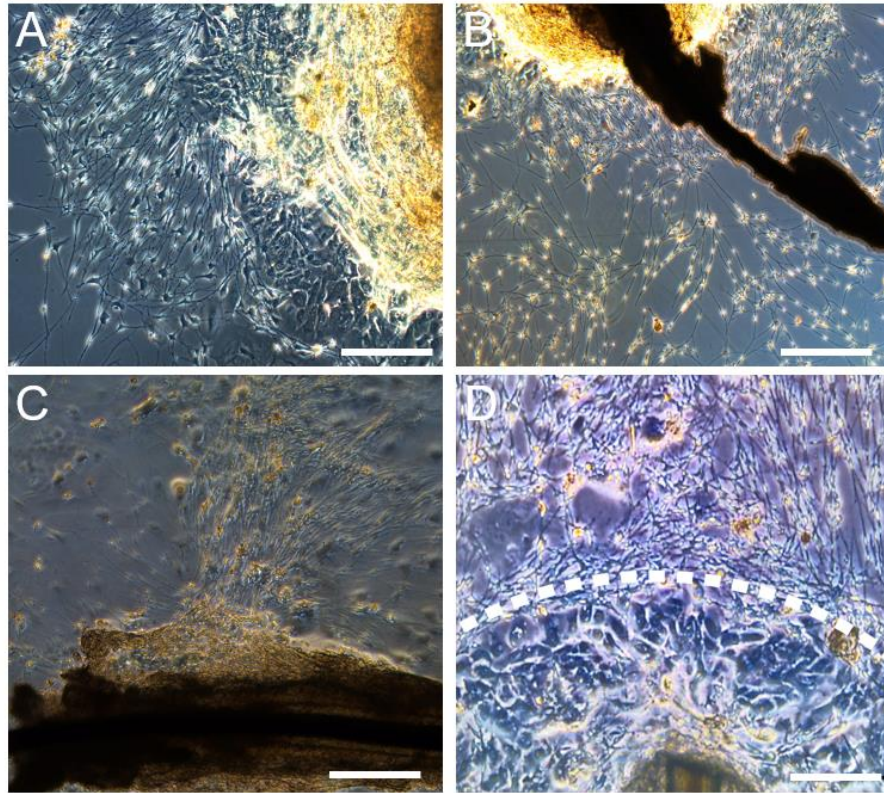

**Figure S7. Stereomicroscope images of ORS-DRG co-cultures.** (A-C) Examples of co-cultures between murine DRG neurons and human ORS cells. (D) Example of ORS cells and DRG neurons showing connectivity between the ORS cells region (dashed line) and the DRG neurons. Scale bars: A, B, C = 80µm, D = 50µm.

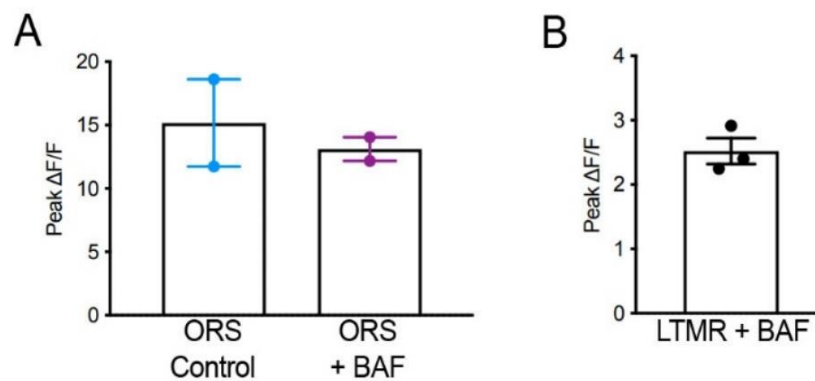

**Figure S8. Effect of Bafilomycin on calcium transients in vitro.** A) Calcium peaks in 2 ORS cells with and without Bafilomycin (BAF) after tactile stimulation of ORS cells. B) Calcium peaks in 3 LTMRs with BAF, after direct stimulation of LTMR (n=3).

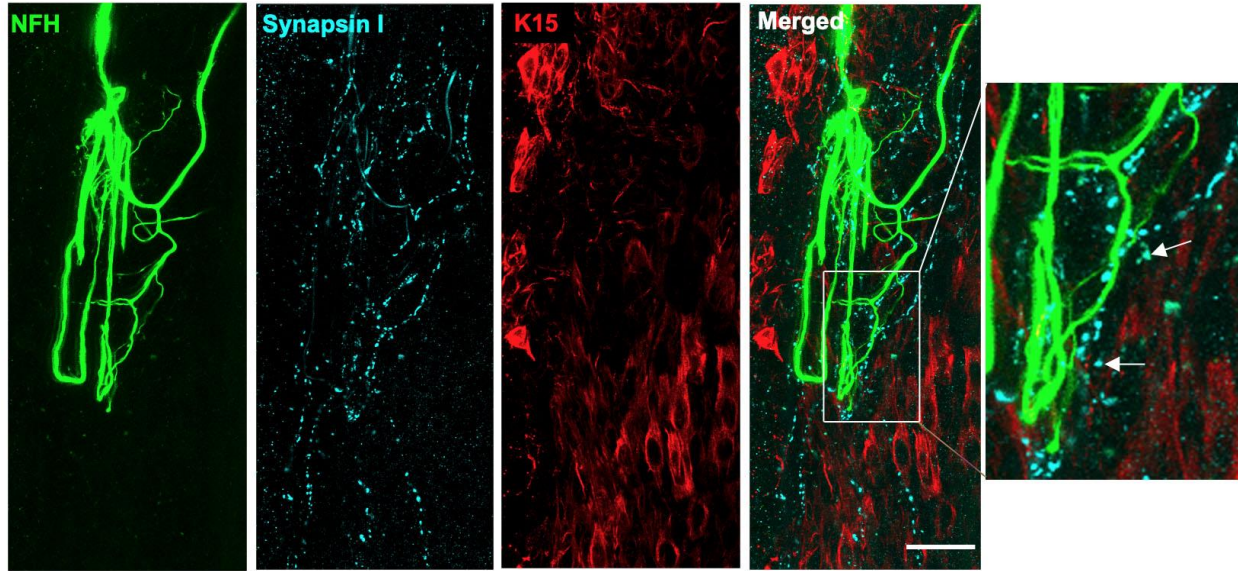

**Figure S9: Synaptic vesicles in vivo.** Immunofluorescence of NFH, Synapsin 1 and K15 in human hair follicle showing synaptic vesicles (arrows in inset) between the K15+ follicle cells and NFH+ nerve.

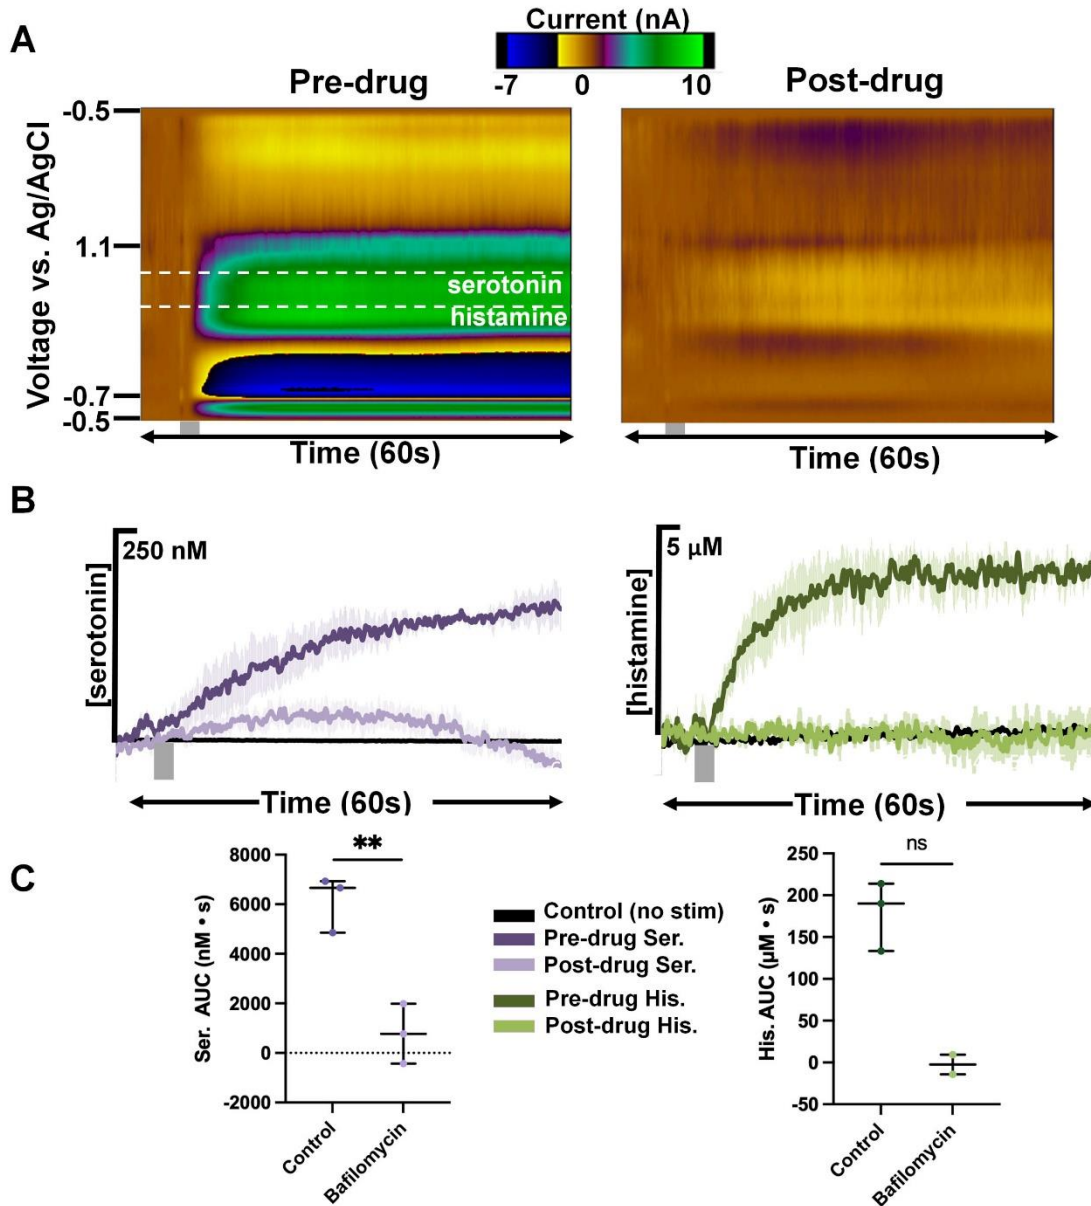

**Figure S10: Direct stimulation of ORS with and without bafilomycin. FSCV analysis of neurochemical release in ORS cells in response to Bafilomycin** (A) Representative colour plots of stimulated release in ORS cells before (left) and after (right) a 10  $\mu$ M dose of bafilomycin for 1 hr. Gray bar denotes the time and duration of the stimulation. (B) Average traces of stimulated release of histamine (right, green) and serotonin (left, purple) in the ORS cells from 1 stim before (dark) and after (light) 10  $\mu$ M bafilomycin. (C) Box and whisker plots comparing the area under the current vs. time curves of histamine (right, green) and serotonin (left, purple) release from the ORS cells before and after 10  $\mu$ M bafilomycin. n = 6 stimulations (serotonin, pre and post bafilomycin) and n=5 stimulations (histamine, pre and post bafilomycin) in 1 culture from 1 patient for ORS cells.



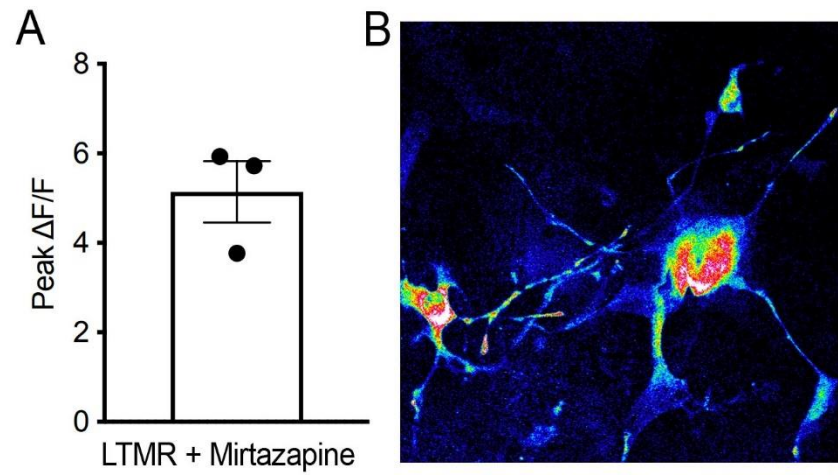

**Figure S11:** Effect of Mirtazapine on calcium transients in DRG neurons in vitro. A) Direct stimulation of LTMR and resultant calcium peak in cells cultured with mirtazapine (n=3). B) Representative calcium transient image in a neuron in vitro after mechanical stimulation.

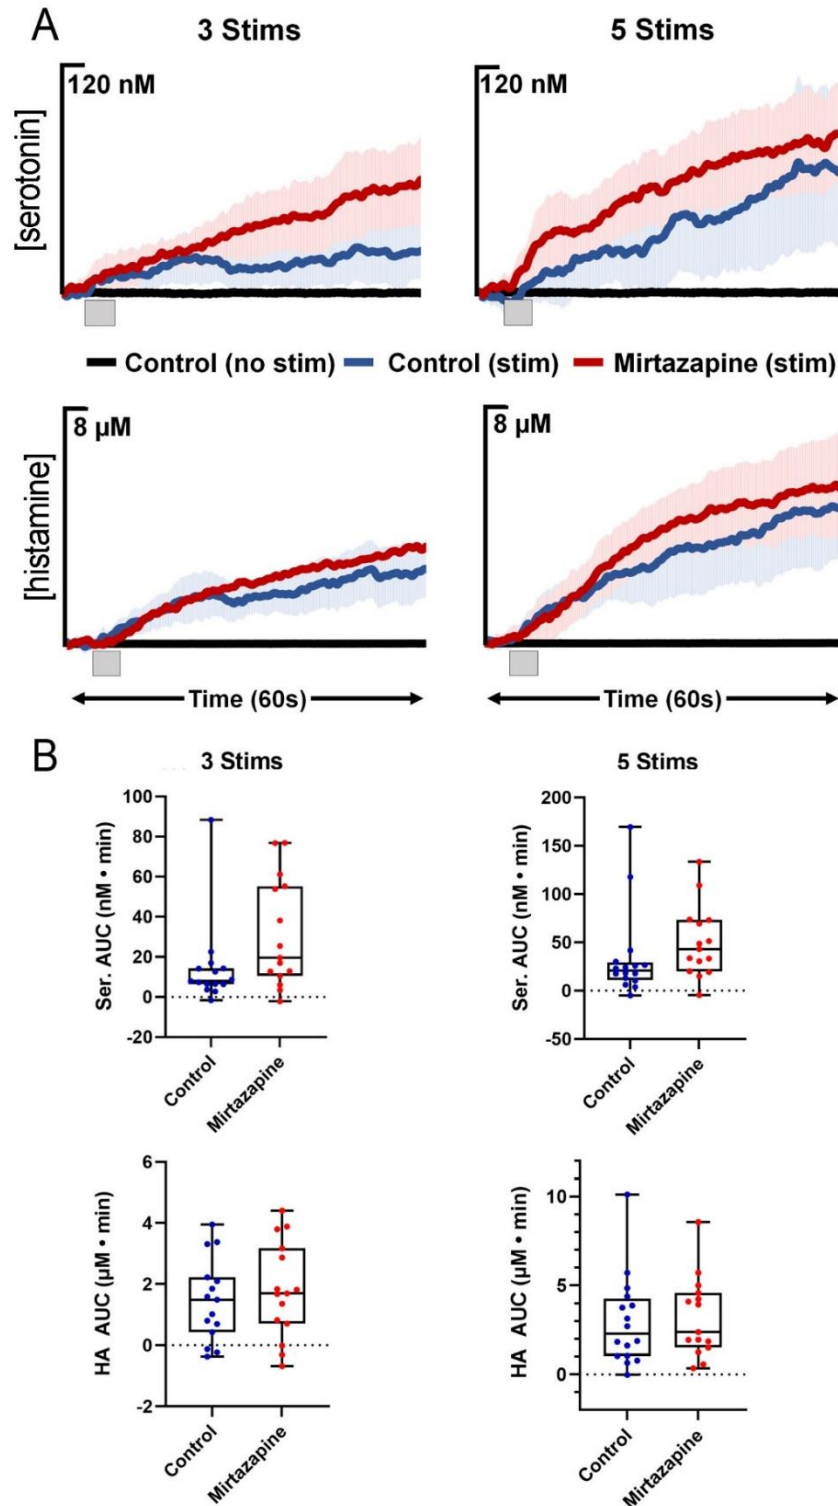

**Figure S12: Direct stimulation of ORS with and without mirtazapine.** (A) Average traces of stimulated release of serotonin (top) and histamine (bottom) from ORS cells with 3 or 5 Stim. Error bars are SEM. (B) Box and whisker plots comparing the area under the current vs. time curves of serotonin (top) and histamine (bottom) release from the ORS cells from 3 or 5 Stim.  $n = 15$  stimulations in 5 ORS cultures from 4 patients.

## Tables

| Figure | Statistical test                     | Comparison                                     | p-value |
|--------|--------------------------------------|------------------------------------------------|---------|
| 2F     | One-way ANOVA, Bonferroni post hoc   | Control vs No external Ca                      | 0.0133  |
|        |                                      | Control vs ER Ca <sup>2+</sup> depleted        | 0.3723  |
|        |                                      | No external Ca vs ER Ca <sup>2+</sup> depleted | 0.0003  |
| 2I     | Unpaired t-test                      | ORS +/- GsMTx-4                                | <0.0001 |
| 3F     | Unpaired t-test                      | LTMR +/- bafilomycin                           | <0.0001 |
| 3I     | Unpaired t-test                      | LTMR +/- Apyrase                               | <0.0001 |
| 4G     | Two-way ANOVA, Tukey-Kramer post-hoc | Histamine ORS vs KC 1 Stim                     | 0.1320  |
|        |                                      | Histamine ORS vs KC 3 Stim                     | 0.4780  |
|        |                                      | Histamine ORS vs KC 5 Stim                     | 0.8720  |
| 4H     | Two-way ANOVA, Tukey-Kramer post-hoc | Serotonin ORS vs KC 1 Stim                     | <0.0001 |
|        |                                      | Serotonin ORS vs KC 3 Stim                     | 0.0042  |
|        |                                      | Serotonin ORS vs KC 5 Stim                     | 0.0012  |
| 5C     | Unpaired t-test                      | ORS +/- mirtazapine                            | 0.9676  |
| 5F     | Unpaired t-test                      | LTMR +/- mirtazapine                           | <0.0001 |
| 5H     | Two-way ANOVA, Tukey-Kramer post-hoc | Serotonin -1 Stim +/- mirtazapine              | 0.0100  |
| 5I     | Two-way ANOVA, Tukey-Kramer post-hoc | Histamine 1 Stim +/- mirtazapine               | 0.1740  |
| S4     | Unpaired t-test                      | <i>K14</i> ORS ex vivo vs in vitro             | 0.2000  |
|        |                                      | <i>K15</i> ORS ex vivo vs in vitro             | 0.6602  |
|        |                                      | <i>K20</i> ORS ex vivo vs in vitro             | 0.0004  |
|        |                                      | <i>VILI</i> ORS ex vivo vs in vitro            | 0.0093  |
|        |                                      | <i>ATO1</i> ORS ex vivo vs in vitro            | 0.0071  |
| S8     | Unpaired t-test                      | ORS +/- bafilomycin                            | 0.6231  |
| S10C   | Two-way ANOVA, Tukey-Kramer post-hoc | Serotonin -1 Stim +/- bafilomycin              | 0.0048  |
|        | Two-way ANOVA, Tukey-Kramer post-hoc | Histamine 1 Stim +/- bafilomycin               | 0.0504  |
| S12B   | Two-way ANOVA, Tukey-Kramer post-hoc | Serotonin 3 Stim +/- mirtazapine               | 0.0707  |
|        |                                      | Serotonin 5 Stim +/- mirtazapine               | 0.2840  |
|        |                                      | Histamine 3 Stim +/- mirtazapine               | 0.5441  |
|        |                                      | Histamine 5 Stim +/- mirtazapine               | 0.7860  |

**Table S1.** Summary of p-values and statistical tests used for all graphical plots in manuscript.

| <b>Gene</b>  | <b>Forward Primer</b>  | <b>Reverse Primer</b>  | <b>Product length (bp)</b> |
|--------------|------------------------|------------------------|----------------------------|
| <i>GAPDH</i> | CGGGAAGCTTGTCATCAATGG  | ATGACGAACATGGGGGCATC   | 206                        |
| <i>K14</i>   | TCCAGGAGATGATTGGCAGC   | GCACATCCATGACCTTGGTG   | 248                        |
| <i>K15</i>   | AGATCGCTACTTACCGCAGCC  | CCTGTCCATCCACTGACTCTTC | 138                        |
| <i>K20</i>   | TAAATGACCGTCTAGCGAGC   | GCAGGACACACCGAGCATT    | 200                        |
| <i>VIL1</i>  | GCTGCTCTACACCTACCTCATC | TTCTGGTCCAGGATGACGGCTT | 122                        |
| <i>ATOH1</i> | ACTTTGCAGGCGAGAGAGCA   | CAGCTCCGGGGAATGTAGCA   | 143                        |

**Table S2.** Primers used for real time PCR

**Data S1. (separate file)**

Calcium imaging data in ORS cells, ORS-LTMR co-cultures and ORS with drug treatments

**Data S2. (separate file)**

FSCV data in ORS cells and keratinocytes, and in ORS cells with drug treatments

**Video S1. (separate file)**

Timelapse video of example calcium imaging in ORS-LTMR coculture
